# Supplementary material
Source: publisher figshare collection journal article supplement (https://frontiersin.figshare.com/ndownloader/files/25658054)
Supplement: Supplementary file [file 25658054]

## Supplementary Material

### 2 Coding scheme – adults’ ways of reference to types of animations/hotspots

| Category                      | Content of reference & type of animation/hotspot          | Explanation                                                                                                                                                                                                                                                                                                                     | Examples                                                                                                                                                                                                                                                                                                                                                                         |
|-------------------------------|-----------------------------------------------------------|---------------------------------------------------------------------------------------------------------------------------------------------------------------------------------------------------------------------------------------------------------------------------------------------------------------------------------|----------------------------------------------------------------------------------------------------------------------------------------------------------------------------------------------------------------------------------------------------------------------------------------------------------------------------------------------------------------------------------|
| <b>Narrative</b>              | Narrative (content) & narrative (type)                    | Narrative reference to an animation/hotspot that is classified as narrative (i.e., the animation/hotspot strengthens or completes the narration of the story line)                                                                                                                                                              | “What is the pig doing?”<br>“They are looking at what the pig is doing, aren’t they?”<br>“Look who is coming” (the pig)<br>“There it is standing in front of the mirror, isn’t it?” (the pig)<br>“Is reading a book, isn’t it?” (the pig)<br>“Is somebody laughing?” (the pig)<br>“They are scratching its back?” (the monster’s back)<br>“Oh, they are all snoring” (bed scene) |
| <b>Illustrative</b>           | Illustrative (content) & illustrative (type)              | Illustrative reference to an animation/hotspot that is classified as illustrative (i.e., the animation/hotspot has exclusively an illustrative/atmospheric function and is not attached to the narrative dimension).                                                                                                            | “It’s hanging loose, isn’t it” (key/comb)<br>“Oh, fell down” (comb)<br>“This is funny” (the slippers can be thrown on the screen)<br>“What is he doing?” (illustrative)<br>“What is crawling up the wall?” (ladybug)<br>“Oops what happens to the slippers”                                                                                                                      |
| <b>Operative-narrative</b>    | Operative-narrative (content) & narrative (type)          | <i>Predominantly</i> operative reference to a narrative animation/hotspot (i.e., only aspects of handling narrative animations/hotspots are referred to). The caregiver may refer to these aspects in terms of her own narrative that is not the same narrative of the story, or she takes up a character of the story.         | “Press the pig”<br>“Can you tickle it, tickle the pig?”<br>“Switch on the light” (as the pig does)<br>“Do the nose of the pig”<br>“The big Grömmel has something to say, I think”                                                                                                                                                                                                |
| <b>Operative-illustrative</b> | Operative -narrative (content) & illustrative (type)      | <i>Predominantly</i> operative reference to an illustrative animation/ hotspot (i.e., only aspects of handling illustrative animations/hotspots are referred to). The caregiver may refer to these aspects in terms of her own narrative that is not the same narrative of the story, or she takes up a character of the story. | “Can you do something with that” (illustrative animation/ hotspot)<br>“This is funny” (the function of an illustrative animation/ hotspot)<br>“Try (pushing) the sausage, maybe the dog will show up”<br>“Can you do the dog?”<br>“You want to put them there?” (the slippers)                                                                                                   |
| <b>Narrative-navigating</b>   | Narrative (content) & navigating (type)                   | Narrative reference to an operative hotspot (turning the page). The caregiver develops her own narrative relating to turning the page.                                                                                                                                                                                          | “Shall we look at the story how to go on?”<br>“Oh, we did not continue telling the story here” (turning two pages accidentally)<br>“So...” (while turning the page)                                                                                                                                                                                                              |
| <b>Operative</b>              | a) Operative (content) & navigating (type)                | a) Operative reference to a navigating type of hotspot (turning the page).                                                                                                                                                                                                                                                      | a) “Let’s continue”<br>“You’re in a hurry”<br>“That was fast, wasn’t it?” (all examples: turning the page)<br>“Can you turn the page, please?”<br>“I think, we have turned one page too far now”<br>“You keep going?”<br>“Now you have turned backwards”<br>“Then you turn forward again”                                                                                        |
|                               | b) Operative (content) & narrative or illustrative (type) | b) <i>Mere</i> operative reference to a narrative or illustrative animation/hotspot. Only operative features are referred to, without taking up a character or developing a new narrative (cf. categories operative-narrative and operative-illustrative).                                                                      | b) “Something’s shining there, isn’t it?”<br>“Touch it”<br>“Once again?”<br>“Try it”<br>“Is something happening there?”<br>“Look, there is something else to press”                                                                                                                                                                                                              |
